# Supplementary material
Source: PubMed Central journal article supplement (PMC4112465)
Supplement: NIHMS607460-supplement-1.pdf [file NIHMS607460-supplement-1.pdf]

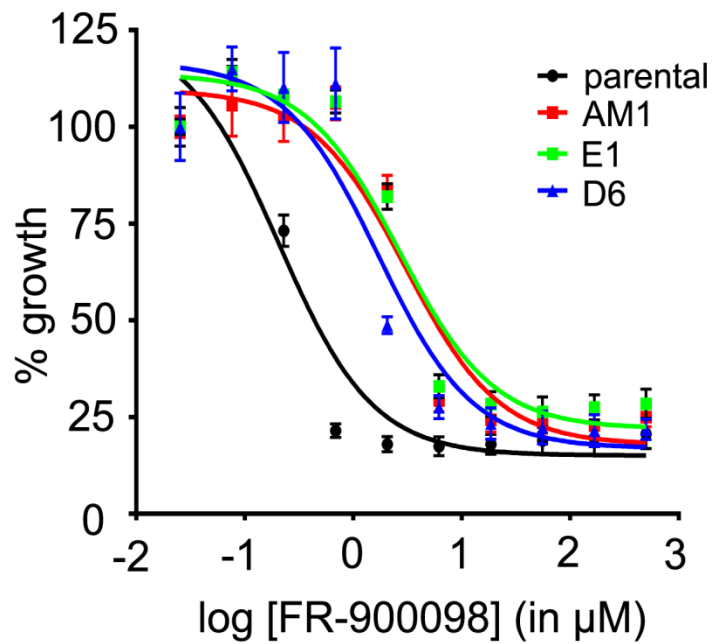

**Supplementary Figure 1. FSM<sup>R</sup> strains are also resistant to the FSM-related compound, FR-900098.** Displayed are the means  $\pm$  standard error of the mean (SEM) of at least three independent experiments. The parental strain has an IC<sub>50</sub> of  $0.23 \pm 0.03 \mu\text{M}$  against FR-900098. FSM<sup>R</sup> strains AM1, E1, and D6 have FR-900098 IC<sub>50</sub>s of  $3.2 \pm 0.24 \mu\text{M}$ ,  $1.7 \pm 0.001 \mu\text{M}$ , and  $2.8 \pm 0.17 \mu\text{M}$ , respectively.

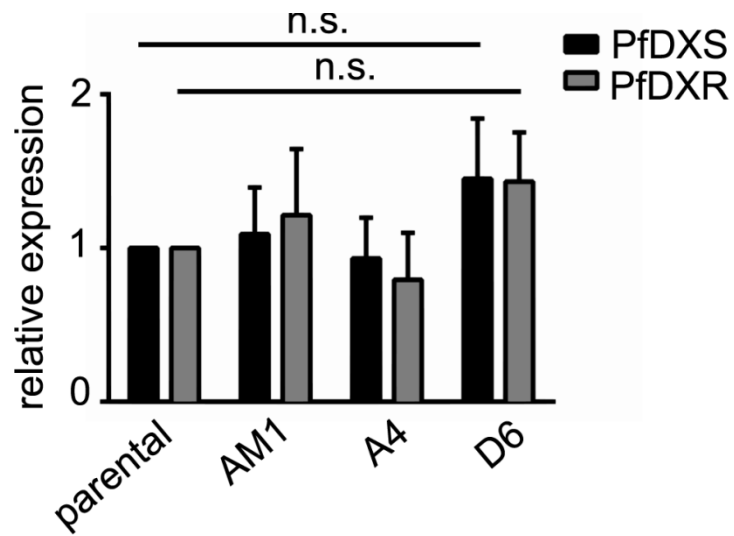

**Supplementary Figure 2. Relative mRNA expression levels of PfDXS and PfDXR are unchanged in FSM<sup>R</sup> strains.** Data represent means and standard error of the mean (SEM) of at least two independent experiments. “N.s.” = not significant. P-values are >0.3 (unpaired Student’s *t*-test) for comparisons shown.

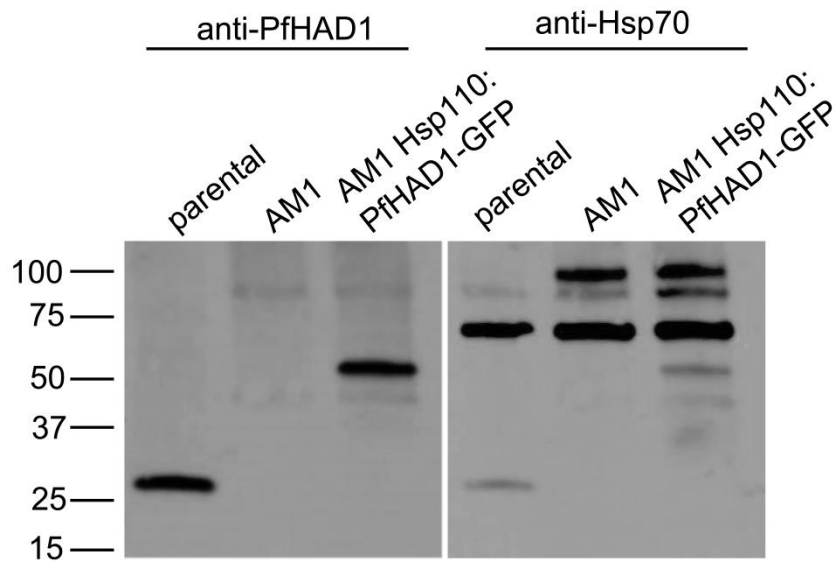

**Supplementary Figure 3. Full immunoblots demonstrating expression of PfHAD1-GFP in FSM<sup>R</sup> strain AM1.** Samples shown are the parental strain, FSM<sup>R</sup> strain AM1, and AM1 Hsp110: PfHAD1-GFP. Marker units are kilodaltons. The blot was probed with anti-PfHAD1 antisera (left), stripped, and re-probed with anti-heat shock protein 70 antisera (right). Expected approximate protein masses: native PfHAD1, 33 kDa; PfHAD1-GFP, 60 kDa; hsp70, 74 kDa. Data are representative of at least three independent experiments.

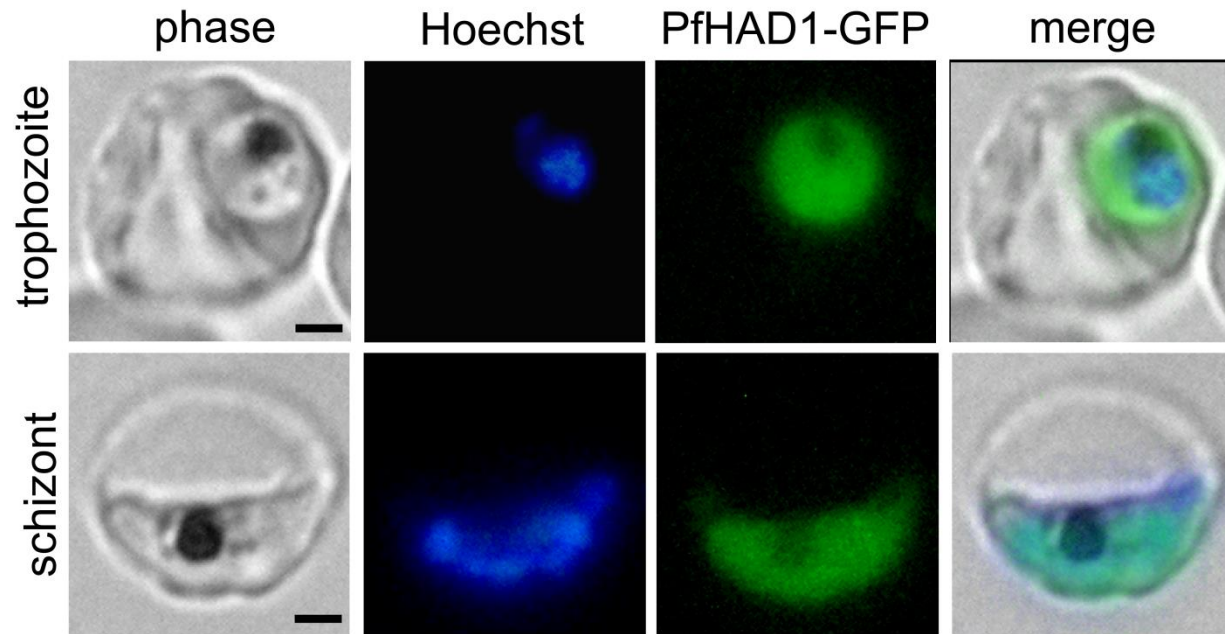

**Supplementary Figure 4. PfHAD1-GFP localization is similar to that of PfHAD1 (Fig. 7).** Shown is live microscopy of AM1 Hsp110: PfHAD1-GFP trophozoite and schizont, stained with Hoechst 33258 nuclear stain. Scale bars represent 2  $\mu$ m.

**a**

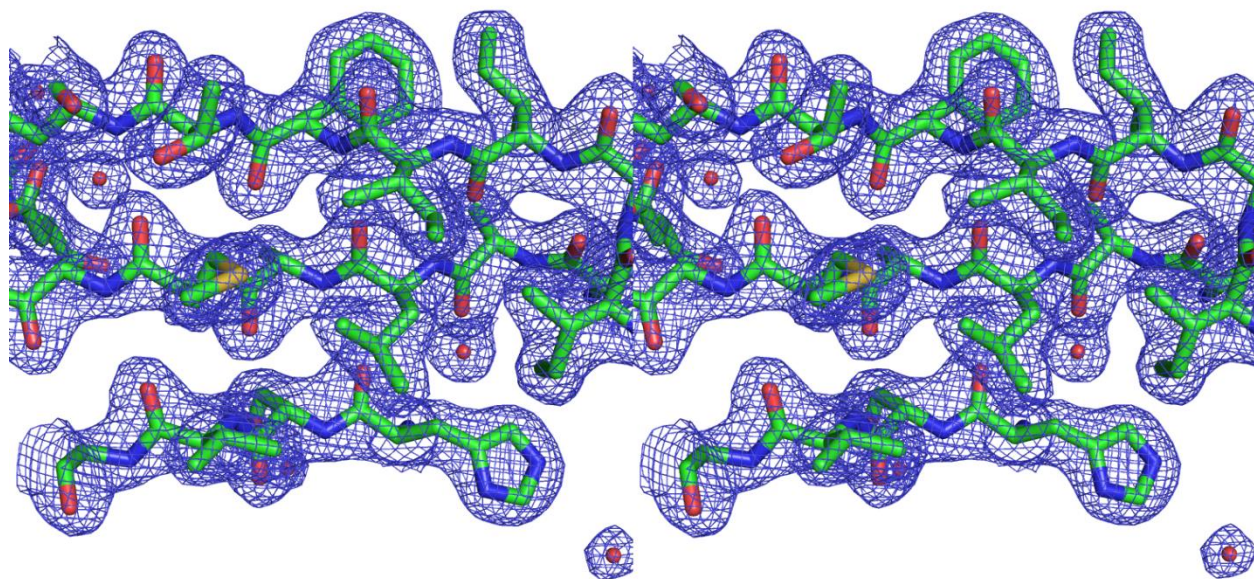

**b**

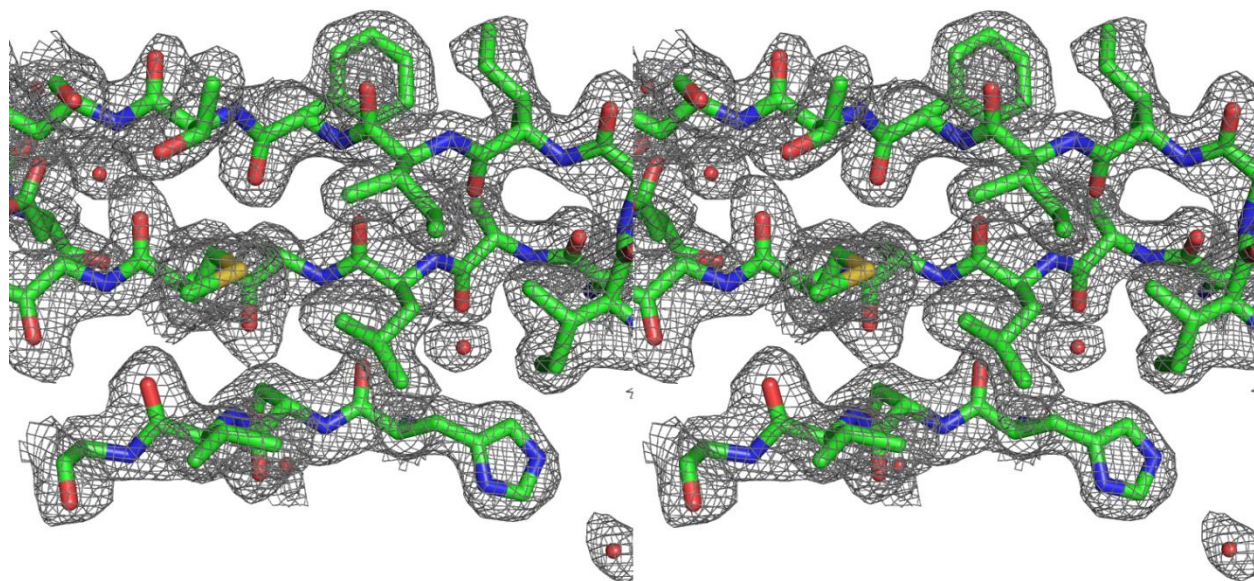

**Supplementary Figure 5. Stereo image of the electron density maps for a representative region of PfHAD1. (a)** The 2Fo-Fc electron density map contoured at  $1.0 \sigma$  is colored blue. **(b)** The composite simulated annealing omit map contoured at  $1.0 \sigma$  is colored grey.

**Supplementary Table 1. FSM IC<sub>50</sub>s, PfHAD1 alleles, and NCBI database accessions for FSM<sup>R</sup> strains.**

| <u>Strain</u> | <u>FSM IC<sub>50</sub></u><br><u>(<math>\mu</math>M)</u> | <u>PfHAD1 change</u>   | <u>PfHAD1 protein</u><br><u>variant</u> | <u>Polyphen-2</u><br><u>score*</u> | <u>SRA</u><br><u>accession #<sup>§</sup></u> | <u>Trace Archive TI</u><br><u>#s<sup>§</sup></u> |
|---------------|----------------------------------------------------------|------------------------|-----------------------------------------|------------------------------------|----------------------------------------------|--------------------------------------------------|
| parental      | 1.1                                                      | none                   | wild-type                               |                                    | SRS561734                                    | 2338198571-75                                    |
| E1            | 8.1                                                      | A28T                   | K10X                                    | n/a*                               | SRS561733                                    | 2338198557-60                                    |
| B4            | 2.8                                                      | A28T                   | K10X                                    | n/a                                |                                              | 2338198501-4                                     |
| A1            | 6.1                                                      | C77G                   | T26R                                    | 0.999                              | SRS561731                                    | 2338198460-63                                    |
| D6            | 8.7                                                      | G89A                   | G30E                                    | 1.000                              | SRS561730                                    | 2338198553-56                                    |
| A3            | 4.6                                                      | $\Delta$ A112          | Frameshift,<br>results in L47X          | n/a                                |                                              | 2338198468-71                                    |
| D2            | 1.5                                                      | C179A                  | A60E                                    | 1.000                              |                                              | 2338198540-43                                    |
| A2            | 4.6                                                      | T388C                  | W130R                                   | 0.941                              |                                              | 2338198464-67                                    |
| A4            | 5.8                                                      | A403 insertion<br>(+A) | Frameshift,<br>results in E140X         | n/a                                |                                              | 2338198472-75                                    |
| MK1           | 3.7                                                      | A443G                  | Y148C                                   | 0.747                              | SRS561761                                    | 2338198569-70                                    |
| AM1           | 5.5                                                      | T623A                  | L208X                                   | n/a                                | SRS561775                                    | 2338198484-87                                    |
| AM2           | 3.3                                                      | T623A                  | L208X                                   | n/a                                | SRS561776                                    | 2338198488-91                                    |
| B1            | 5.9                                                      | $\Delta$ 681-685       | Frameshift,<br>results in E240X         | n/a                                | SRS561732                                    | 2338198492-95                                    |
| F1            | 3.7                                                      | $\Delta$ 681-685       | Frameshift,<br>results in E240X         | n/a                                |                                              | 2338198565-68                                    |
| D3            | 4.3                                                      | $\Delta$ 681-685       | Frameshift,<br>results in E240X         | n/a                                |                                              | 2338198544-47                                    |
| A5            | 5.4                                                      | $\Delta$ C698          | Frameshift,<br>results in L234X         | n/a                                |                                              | 2338198476-79                                    |
| D4            | 2.0                                                      | none                   | wild-type                               |                                    |                                              | 2338198548-52                                    |
| A6            | 4.1                                                      | none                   | wild-type                               |                                    | SRS561778                                    | 2338198480-83                                    |
| E2            | 4.6                                                      | none                   | wild-type                               |                                    |                                              | 2338198561-64                                    |
| B2            | 5.0                                                      | none                   | wild-type                               |                                    |                                              | 2338198496-500                                   |
| D1            | 4.7                                                      | none                   | wild-type                               |                                    | SRS561777                                    | 2338198536-39                                    |

\* = Polyphen-2 scores cannot be calculated for truncation mutations. Polyphen-2 is an algorithm for predicting the probability of deleterious effects of missense mutations.

§ = Whole genome sequencing data is deposited in the NCBI BioProject and Sequence Read Archive databases. Representative Sanger sequencing data of the PfHAD1 locus is deposited in the NCBI Trace Archive.

**Supplementary Table 2. Kinetic parameters for PfHAD1 with the top three tested substrates and gly3P.** Shown are means  $\pm$  standard error of the mean (SEM) of at least three independent experiments.

| <b>Substrate</b> | <b><math>K_m</math> (mM)</b> | <b><math>k_{cat}</math> (sec<sup>-1</sup>)</b> | <b><math>k_{cat}/K_m</math> (M<sup>-1</sup> sec<sup>-1</sup>)</b> |
|------------------|------------------------------|------------------------------------------------|-------------------------------------------------------------------|
| fru1P            | 2.5 $\pm$ 0.6                | 5.2 $\pm$ 0.9                                  | 2.1 $\times 10^3$                                                 |
| glc2P            | 6.5 $\pm$ 0.8                | 8.5 $\pm$ 0.2                                  | 1.3 $\times 10^3$                                                 |
| man6P            | 3.6 $\pm$ 0.8                | 3.1 $\pm$ 0.3                                  | 0.9 $\times 10^3$                                                 |
| gly3P            | 4.6 $\pm$ 0.7                | 11 $\pm$ 4.3                                   | 2.4 $\times 10^3$                                                 |

**Supplementary Table 3. FSM<sup>R</sup> strains possessed increased levels of MEP pathway metabolites.** Shown are concentrations of MEP pathway intermediates in *P. falciparum* FSM<sup>R</sup> PfHAD1 strains. Data shown are means  $\pm$  standard error of the mean (SEM) of at least three independent experiments.

| Compound<br>(attograms/cell) | DOXP                |                     | MEP                |                    | CDP-ME               |                      | MEcPP               |                    |
|------------------------------|---------------------|---------------------|--------------------|--------------------|----------------------|----------------------|---------------------|--------------------|
|                              | - FSM               | + FSM               | - FSM              | + FSM              | - FSM                | + FSM                | - FSM               | + FSM              |
| parental                     | 0.20 $\pm$<br>0.01  | 0.25 $\pm$<br>0.03  | 1.03 $\pm$<br>0.36 | 1.03 $\pm$<br>0.38 | 0.020 $\pm$<br>0.007 | 0.015 $\pm$<br>0.007 | 16.02 $\pm$<br>0.81 | 1.34 $\pm$<br>0.29 |
| B4                           | 6.58 $\pm$<br>3.14  | 18.73 $\pm$<br>1.02 | 0.87 $\pm$<br>0.32 | 0.27 $\pm$<br>0.02 | 0.056 $\pm$<br>0.004 | 0.049 $\pm$<br>0.007 | 15.62 $\pm$<br>0.44 | 3.39 $\pm$<br>0.21 |
| E1                           | 10.06 $\pm$<br>1.41 | 17.26 $\pm$<br>2.18 | 3.97 $\pm$<br>0.29 | 2.94 $\pm$<br>0.28 | 0.057 $\pm$<br>0.005 | 0.029 $\pm$<br>0.005 | 24.35 $\pm$<br>3.56 | 3.82 $\pm$<br>0.45 |
| A1                           | 17.12 $\pm$<br>2.52 | 33.39 $\pm$<br>2.99 | 2.77 $\pm$<br>0.30 | 0.75 $\pm$<br>0.10 | 0.077 $\pm$<br>0.006 | 0.056 $\pm$<br>0.006 | 55.14 $\pm$<br>5.01 | 7.18 $\pm$<br>0.85 |
| D6                           | 8.50 $\pm$<br>1.35  | 13.98 $\pm$<br>2.79 | 4.19 $\pm$<br>0.53 | 3.05 $\pm$<br>0.42 | 0.035 $\pm$<br>0.004 | 0.018 $\pm$<br>0.001 | 26.65 $\pm$<br>4.13 | 4.28 $\pm$<br>0.82 |
| A3                           | 10.03 $\pm$<br>0.86 | 14.86 $\pm$<br>2.64 | 1.51 $\pm$<br>0.10 | 0.33 $\pm$<br>0.10 | 0.053 $\pm$<br>0.003 | 0.031 $\pm$<br>0.003 | 25.21 $\pm$<br>2.07 | 3.07 $\pm$<br>0.41 |
| A4                           | 11.03 $\pm$<br>1.54 | 14.44 $\pm$<br>5.18 | 2.02 $\pm$<br>0.27 | 0.42 $\pm$<br>0.18 | 0.079 $\pm$<br>0.005 | 0.038 $\pm$<br>0.010 | 33.95 $\pm$<br>2.85 | 2.69 $\pm$<br>0.71 |
| AM1                          | 14.71 $\pm$<br>1.28 | 28.2 $\pm$<br>3.61  | 1.65 $\pm$<br>0.14 | 0.38 $\pm$<br>0.02 | 0.064 $\pm$<br>0.007 | 0.038 $\pm$<br>0.002 | 20.06 $\pm$<br>1.45 | 3.11 $\pm$<br>0.48 |
| A5                           | 10.31 $\pm$<br>1.24 | 16.63 $\pm$<br>3.28 | 1.10 $\pm$<br>0.12 | 0.14 $\pm$<br>0.02 | 0.104 $\pm$<br>0.011 | 0.044 $\pm$<br>0.005 | 12.64 $\pm$<br>1.53 | 1.47 $\pm$<br>0.23 |
